# Supplementary material
Source: PubMed Central journal article supplement (PMC2903038)
Supplement: NIHMS212609-supplement-1_si_001.pdf [file NIHMS212609-supplement-1_si_001.pdf]

# Exploring Solvent Effects upon the Menshutkin Reaction using a Polarizable Force Field

Orlando Acevedo<sup>†,\*</sup> and William L. Jorgensen<sup>‡</sup>

*Department of Chemistry and Biochemistry, Auburn University, Auburn, Alabama 36849 and the Department of Chemistry, Yale University, 225 Prospect Street, New Haven, Connecticut 06520-8107. <sup>†</sup> Auburn University. <sup>‡</sup> Yale University.*

## Supporting Material

|                                                                                                                      |       |
|----------------------------------------------------------------------------------------------------------------------|-------|
| <b>Figure S1.</b> Solute-solvent energy pair distributions in THF .....                                              | S1    |
| <b>Figure S2.</b> Solute-solvent energy pair distributions in cyclohexane .....                                      | S2    |
| <b>Figure S3.</b> Solute-solvent energy pair distributions in CCl <sub>4</sub> .....                                 | S2    |
| <b>Figure S4.</b> Solute-solvent energy pair distributions in CH <sub>3</sub> OH.....                                | S3    |
| <b>Figure S5.</b> Solute-solvent energy pair distributions in CH <sub>3</sub> CN.....                                | S3    |
| Gas-Phase optimization outputs and frequencies for Menshutkin transition structures using B3LYP and MP2 methods..... | S4-S9 |
| Gaussian 03 reference.....                                                                                           | S9    |

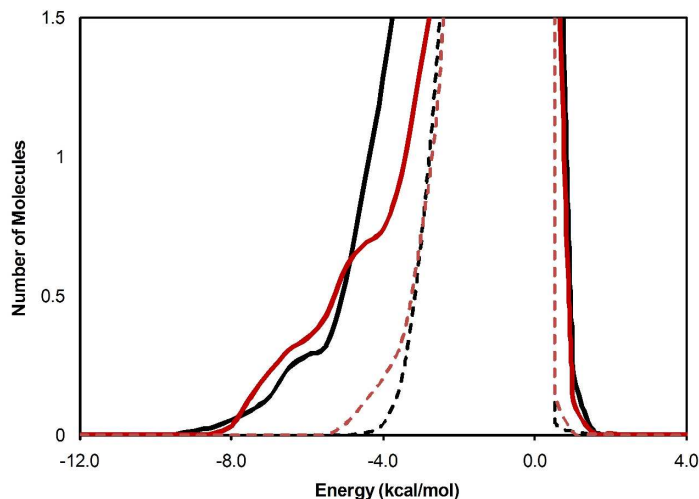

**Figure S1.** Solute-solvent energy pair distributions at 25 °C for the Menshutkin rearrangement of triethylamine and ethyl iodide in THF. OPLS-AA in black and OPLS-AAP in red with transition structures represented by solid lines and reactants by dashed lines.

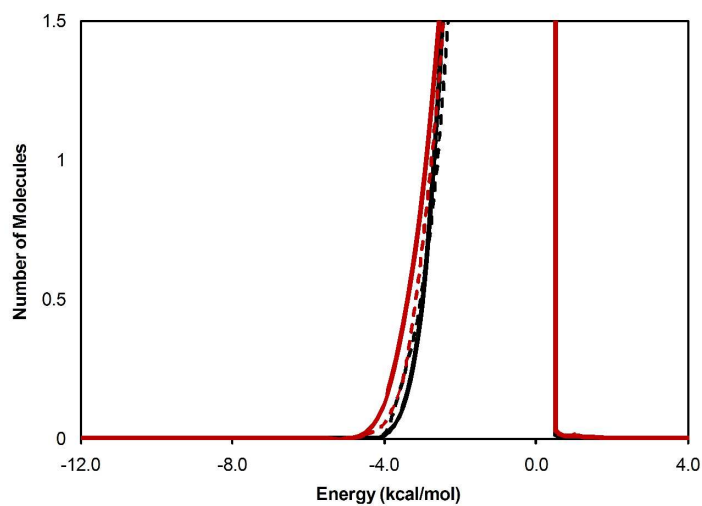

**Figure S2.** Solute-solvent energy pair distributions at 25 °C for the Menshutkin rearrangement of triethylamine and ethyl iodide in cyclohexane. OPLS-AA in black and OPLS-AAP in red with transition structures represented by solid lines and reactants by dashed lines.

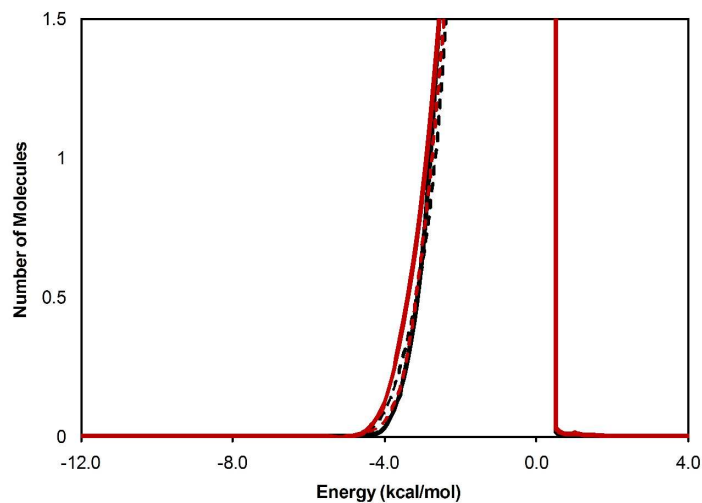

**Figure S3.** Solute-solvent energy pair distributions at 25 °C for the Menshutkin rearrangement of triethylamine and ethyl iodide in CCl<sub>4</sub>. OPLS-AA in black and OPLS-AAP in red with transition structures represented by solid lines and reactants by dashed lines.

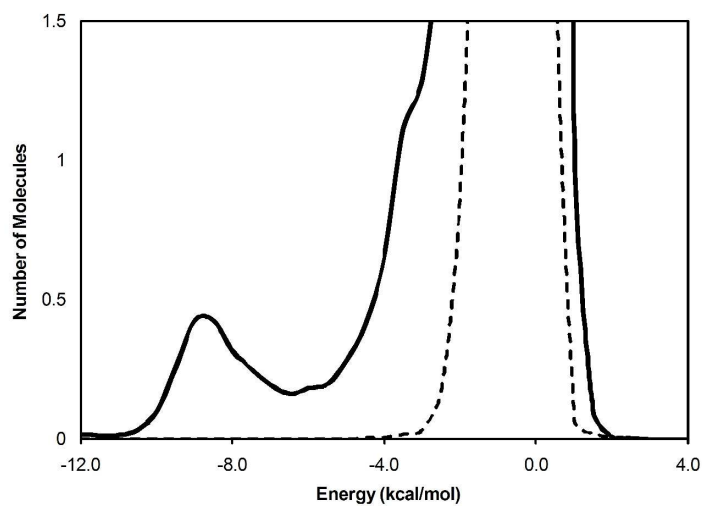

**Figure S4.** Solute-solvent energy pair distributions at 25 °C for the Menshutkin rearrangement of triethylamine and ethyl iodide in CH<sub>3</sub>OH. The transition structure is represented by a solid line and reactants by a dashed line.

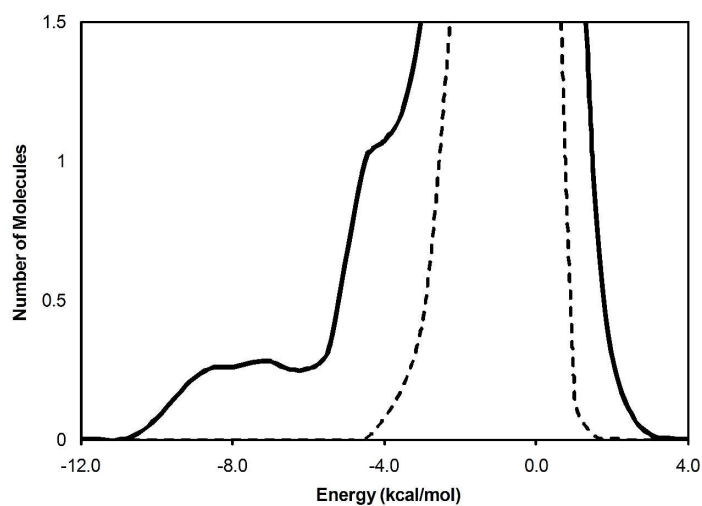

**Figure S5.** Solute-solvent energy pair distributions at 25 °C for the Menshutkin rearrangement of triethylamine and ethyl iodide in CH<sub>3</sub>CN. The transition structure is represented by a solid line and reactants by a dashed line.

**B3LYP/LANL2DZ transition structure:**

|                | 1         | 2       | 3       |
|----------------|-----------|---------|---------|
|                | A         | A       | A       |
| Frequencies -- | -341.0867 | 37.2959 | 61.4458 |
| Red. masses -- | 8.0257    | 3.5417  | 2.9992  |
| Frc consts --  | 0.5501    | 0.0029  | 0.0067  |
| IR Inten --    | 910.4264  | 0.8306  | 3.0632  |

Sum of electronic and zero-point Energies= -382.655184  
 Sum of electronic and thermal Energies= -382.640696  
 Sum of electronic and thermal Enthalpies= -382.639752  
 Sum of electronic and thermal Free Energies= -382.698148

```
1|1|UNPC-UNK|FTS|RB3LYP|LANL2DZ|C8H20I1N1|PCUSER|30-May-2005|1||# B3LY
P/LANL2DZ OPT=(MNDOFC,TS,NOEIGEN,Z-MATRIX)|ET3N + EtI Menshutkin||0,1
|N|C,1,B1|C,1,B2,2,A1|C,1,B3,3,A2,2,D1,0|H,2,B4,1,A3,4,D2,0|C,2,B5,1,A
4,4,D3,0|H,2,B6,1,A5,4,D4,0|H,3,B7,1,A6,4,D5,0|C,3,B8,1,A7,4,D6,0|H,3,
B9,1,A8,4,D7,0|H,4,B10,1,A9,3,D8,0|C,4,B11,1,A10,3,D9,0|H,4,B12,1,A11,
3,D10,0|H,6,B13,2,A12,1,D11,0|H,6,B14,2,A13,1,D12,0|H,6,B15,2,A14,1,D1
3,0|H,9,B16,3,A15,1,D14,0|H,9,B17,3,A16,1,D15,0|H,9,B18,3,A17,1,D16,0|
H,12,B19,4,A18,1,D17,0|H,12,B20,4,A19,1,D18,0|H,12,B21,4,A20,1,D19,0|C
,1,B22,4,A21,12,D20,0|H,23,B23,1,A22,4,D21,0|C,23,B24,1,A23,4,D22,0|H,
23,B25,1,A24,4,D23,0|H,25,B26,23,A25,1,D24,0|H,25,B27,23,A26,1,D25,0|H
,25,B28,23,A27,1,D26,0|I,23,B29,1,A28,4,D27,0||B1=1.50995801|B2=1.5155
996|B3=1.50652828|B4=1.09333124|B5=1.53714642|B6=1.10436929|B7=1.09349
11|B8=1.53910683|B9=1.10410582|B10=1.0928208|B11=1.53791135|B12=1.1049
686|B13=1.09540257|B14=1.09418442|B15=1.09705551|B16=1.09473152|B17=1.
09731569|B18=1.09523976|B19=1.09506472|B20=1.09707298|B21=1.09482549|B
23=1.07968823|B24=1.51881946|B25=1.07945955|B26=1.09342058|B27=1.09776
134|B28=1.09335705|A1=110.25602236|A2=110.21053477|A3=107.0844497|A4=1
15.55433502|A5=108.33419109|A6=107.02918998|A7=116.104339|A8=107.95181
026|A9=107.54491003|A10=115.09537002|A11=108.37206163|A12=113.0248421|
A13=111.61689614|A14=108.42576068|A15=112.47468461|A16=108.04179173|A1
7=112.90979465|A18=111.70020451|A19=108.70856242|A20=112.76975834|A21=
113.65530817|A22=90.62648988|A23=108.53539139|A24=89.85520571|A25=110.
5982288|A26=112.11011378|A27=110.30390625|A28=154.06631375|D1=-122.835
55427|D2=180.9029277|D3=-58.08068072|D4=65.4899165|D5=59.91040819|D6=-
178.75249224|D7=-55.40218282|D8=181.12578205|D9=-57.29941147|D10=65.82
602995|D11=67.32886721|D12=-55.55336101|D13=-173.94268017|D14=-56.6393
9837|D15=-174.75937541|D16=67.02902906|D17=-52.78191074|D18=188.545699
69|D19=69.74630107|D20=58.15494682|D21=-88.37746045|D22=33.25649429|D2
3=154.83383239|D24=117.57345741|D25=-3.21972973|D26=-123.67689963|D27=
-148.29044247|B22=2.08283943|B29=2.919808||Version=x86-Win32-G03RevB.0
5|State=1-A|HF=-382.9309414|RMSD=5.231e-009|RMSF=5.797e-005|Dipole=0.3
66989,-4.7505932,1.430699|PG=C01 [X(C8H20I1N1)]||@
```

**B3LYP/SVP transition structure:**

|                | 1         | 2       | 3       |
|----------------|-----------|---------|---------|
|                | A         | A       | A       |
| Frequencies -- | -373.6424 | 39.7830 | 55.7270 |
| Red. masses -- | 7.9292    | 2.9074  | 2.1835  |

|            |    |          |        |        |
|------------|----|----------|--------|--------|
| Frc consts | -- | 0.6522   | 0.0027 | 0.0040 |
| IR Inten   | -- | 967.2118 | 1.3771 | 0.6010 |

|                                              |              |
|----------------------------------------------|--------------|
| Sum of electronic and zero-point Energies=   | -7290.931573 |
| Sum of electronic and thermal Energies=      | -7290.917126 |
| Sum of electronic and thermal Enthalpies=    | -7290.916182 |
| Sum of electronic and thermal Free Energies= | -7290.974441 |

```

1|1|UNPC-UNK|FTS|RB3LYP|SVP|C8H20I1N1|PCUSER|31-May-2005|1||# B3LYP/SV
P OPT=(TS,NOEIGEN,Z-MATRIX)||ET3N + EtI Menshutkin||0,1|N|C,1,B1|C,1,B
2,2,A1|C,1,B3,3,A2,2,D1,0|H,2,B4,1,A3,4,D2,0|C,2,B5,1,A4,4,D3,0|H,2,B6
,1,A5,4,D4,0|H,3,B7,1,A6,4,D5,0|C,3,B8,1,A7,4,D6,0|H,3,B9,1,A8,4,D7,0|
H,4,B10,1,A9,3,D8,0|C,4,B11,1,A10,3,D9,0|H,4,B12,1,A11,3,D10,0|H,6,B13
,2,A12,1,D11,0|H,6,B14,2,A13,1,D12,0|H,6,B15,2,A14,1,D13,0|H,9,B16,3,A
15,1,D14,0|H,9,B17,3,A16,1,D15,0|H,9,B18,3,A17,1,D16,0|H,12,B19,4,A18,
1,D17,0|H,12,B20,4,A19,1,D18,0|H,12,B21,4,A20,1,D19,0|C,1,B22,4,A21,12
,D20,0|H,23,B23,1,A22,4,D21,0|C,23,B24,1,A23,4,D22,0|H,23,B25,1,A24,4,
D23,0|H,25,B26,23,A25,1,D24,0|H,25,B27,23,A26,1,D25,0|H,25,B28,23,A27,
1,D26,0|I,23,B29,1,A28,4,D27,0||B1=1.48873796|B2=1.49519384|B3=1.48550
145|B4=1.09749721|B5=1.52497875|B6=1.10784306|B7=1.09755689|B8=1.52784
874|B9=1.10739148|B10=1.09732302|B11=1.52618091|B12=1.10835764|B13=1.0
9986919|B14=1.09859581|B15=1.10084642|B16=1.10077365|B17=1.10106398|B1
8=1.09994963|B19=1.09943145|B20=1.10084384|B21=1.09921099|B23=1.084347
08|B24=1.50754478|B25=1.08415373|B26=1.09804783|B27=1.10218749|B28=1.0
9802672|A1=109.85870825|A2=110.10395069|A3=106.88255253|A4=116.9154815
8|A5=107.7497653|A6=106.85320929|A7=117.26148959|A8=107.34246306|A9=10
7.30666612|A10=116.23134838|A11=107.99043639|A12=113.40040142|A13=112.
11688471|A14=108.13094344|A15=113.02906348|A16=107.62492396|A17=113.19
762516|A18=112.2454146|A19=108.43581875|A20=113.08134622|A21=113.27074
006|A22=92.84467715|A23=109.45183141|A24=92.20371517|A25=110.65738494|
A26=112.55746521|A27=110.36751243|A28=153.3713145|D1=-122.27723243|D2=
175.70730996|D3=-62.59888986|D4=61.50730414|D5=54.64847564|D6=-183.502
93468|D7=-59.52846119|D8=177.11397059|D9=-60.70849033|D10=62.95043643|
D11=63.0519745|D12=-60.32063973|D13=-178.51946764|D14=-60.06431521|D15
=-178.25008721|D16=64.07329068|D17=-54.72882634|D18=186.7145944|D19=68
.2493053|D20=54.75243215|D21=-84.91985258|D22=37.1989416|D23=159.47899
542|D24=118.54760396|D25=-2.13223126|D26=-122.71830589|D27=-143.868901
27|B22=2.00611522|B29=2.92865915||Version=x86-Win32-G03RevB.05|State=1
-A|HF=-7291.2042473|RMSD=9.365e-009|RMSF=1.938e-005|Dipole=0.2481397,-
4.5347038,1.5317102|PG=C01 [X(C8H20I1N1)]||@

```

**B3LYP/MIDI! transition structure:**

|             | 1            | 2       | 3       |
|-------------|--------------|---------|---------|
|             | A            | A       | A       |
| Frequencies | -- -361.8232 | 40.7863 | 63.6437 |
| Red. masses | -- 8.0159    | 2.9091  | 2.4160  |
| Frc consts  | -- 0.6183    | 0.0029  | 0.0058  |
| IR Inten    | -- 1005.9903 | 1.3362  | 1.2376  |

|                                              |              |
|----------------------------------------------|--------------|
| Sum of electronic and zero-point Energies=   | -7259.304214 |
| Sum of electronic and thermal Energies=      | -7259.289935 |
| Sum of electronic and thermal Enthalpies=    | -7259.288991 |
| Sum of electronic and thermal Free Energies= | -7259.346793 |

```

1|1|UNPC-UNK|FTS|RB3LYP|MIDIx|C8H20I1N1|PCUSER|31-May-2005|1||# B3LYP/
MIDIX OPT=(TS,NOEIGEN,Z-MATRIX)||ET3N + EtI Menshutkin||0,1|N|C,1,B1|C
,1,B2,2,A1|C,1,B3,3,A2,2,D1,0|H,2,B4,1,A3,4,D2,0|C,2,B5,1,A4,4,D3,0|H,
2,B6,1,A5,4,D4,0|H,3,B7,1,A6,4,D5,0|C,3,B8,1,A7,4,D6,0|H,3,B9,1,A8,4,D
7,0|H,4,B10,1,A9,3,D8,0|C,4,B11,1,A10,3,D9,0|H,4,B12,1,A11,3,D10,0|H,6
,B13,2,A12,1,D11,0|H,6,B14,2,A13,1,D12,0|H,6,B15,2,A14,1,D13,0|H,9,B16
,3,A15,1,D14,0|H,9,B17,3,A16,1,D15,0|H,9,B18,3,A17,1,D16,0|H,12,B19,4,
A18,1,D17,0|H,12,B20,4,A19,1,D18,0|H,12,B21,4,A20,1,D19,0|C,1,B22,4,A2
1,12,D20,0|H,23,B23,1,A22,4,D21,0|C,23,B24,1,A23,4,D22,0|H,23,B25,1,A2
4,4,D23,0|H,25,B26,23,A25,1,D24,0|H,25,B27,23,A26,1,D25,0|H,25,B28,23,
A27,1,D26,0|I,23,B29,1,A28,4,D27,0||B1=1.5017002|B2=1.50821726|B3=1.49
891088|B4=1.09451536|B5=1.53871153|B6=1.10465843|B7=1.09478821|B8=1.54
271401|B9=1.10440058|B10=1.0938806|B11=1.54022565|B12=1.10538061|B13=1
.09703077|B14=1.09610422|B15=1.0991168|B16=1.09836645|B17=1.09950051|B
18=1.09708658|B19=1.09689199|B20=1.09910217|B21=1.09647926|B23=1.07973
648|B24=1.51897173|B25=1.07991521|B26=1.09591086|B27=1.10016891|B28=1.
09584305|A1=109.29655323|A2=109.46253385|A3=106.58663228|A4=115.474849
59|A5=108.15270071|A6=106.56023425|A7=116.22240537|A8=107.68065652|A9=
107.06196664|A10=114.90927346|A11=108.26713768|A12=112.90481778|A13=11
1.28841045|A14=108.19457935|A15=112.49084226|A16=107.55314764|A17=112.
78612264|A18=111.42704263|A19=108.46129498|A20=112.61640974|A21=114.55
866982|A22=92.46121719|A23=108.89895045|A24=91.78247696|A25=110.387627
69|A26=112.381503|A27=110.22292111|A28=154.28200345|D1=-120.79599037|D
2=175.48472761|D3=-63.90248628|D4=59.99299115|D5=56.13483441|D6=-182.9
4665871|D7=-59.2376197|D8=176.57126153|D9=-62.20585243|D10=61.07864024
|D11=65.1489345|D12=-57.72684147|D13=-176.10671903|D14=-58.87302071|D1
5=-177.05082579|D16=64.99164694|D17=-52.20045218|D18=189.18494705|D19=
70.45347605|D20=53.75849811|D21=-85.69671761|D22=36.00184155|D23=157.8
1508091|D24=119.71571667|D25=-1.09248111|D26=-121.95317766|D27=-145.00
041856|B22=1.9958077|B29=2.89202073|Version=x86-Win32-G03RevB.05|Stat
e=1-A|HF=-7259.5799437|RMSD=3.635e-009|RMSF=3.130e-005|Dipole=0.354001
9,-4.6073681,1.5550361|PG=C01 [X(C8H20I1N1)]||@

```

**B3LYP/6-311G(d,p) transition structure:**

|                                              | 1         | 2            | 3       |
|----------------------------------------------|-----------|--------------|---------|
|                                              | A         | A            | A       |
| Frequencies --                               | -365.6897 | 41.1876      | 62.7579 |
| Red. masses --                               | 8.0357    | 3.5203       | 3.2866  |
| Frc consts --                                | 0.6331    | 0.0035       | 0.0076  |
| IR Inten --                                  | 999.4154  | 1.1262       | 4.3120  |
| Sum of electronic and zero-point Energies=   |           | -7290.966553 |         |
| Sum of electronic and thermal Energies=      |           | -7290.952088 |         |
| Sum of electronic and thermal Enthalpies=    |           | -7290.951144 |         |
| Sum of electronic and thermal Free Energies= |           | -7291.009339 |         |

```

1|1|UNPC-UNK|FTS|RB3LYP|Gen|C8H20I1N1|PCUSER|18-Aug-2005|1||# B3LYP/6-
311G** EXTRABASIS OPT=(CALCF, TS,NOEIGEN,Z-MATRIX)||ET3N + EtI Menshut
kin + 6-311G** for I||0,1|N|C,1,B1|C,1,B2,2,A1|C,1,B3,3,A2,2,D1,0|H,2,
B4,1,A3,4,D2,0|C,2,B5,1,A4,4,D3,0|H,2,B6,1,A5,4,D4,0|H,3,B7,1,A6,4,D5,
0|C,3,B8,1,A7,4,D6,0|H,3,B9,1,A8,4,D7,0|H,4,B10,1,A9,3,D8,0|C,4,B11,1,
A10,3,D9,0|H,4,B12,1,A11,3,D10,0|H,6,B13,2,A12,1,D11,0|H,6,B14,2,A13,1
,D12,0|H,6,B15,2,A14,1,D13,0|H,9,B16,3,A15,1,D14,0|H,9,B17,3,A16,1,D15
,0|H,9,B18,3,A17,1,D16,0|H,12,B19,4,A18,1,D17,0|H,12,B20,4,A19,1,D18,0

```

|H, 12, B21, 4, A20, 1, D19, 0|C, 1, B22, 4, A21, 12, D20, 0|H, 23, B23, 1, A22, 4, D21, 0|C, 23, B24, 1, A23, 4, D22, 0|H, 23, B25, 1, A24, 4, D23, 0|H, 25, B26, 23, A25, 1, D24, 0|H, 25, B27, 23, A26, 1, D25, 0|H, 25, B28, 23, A27, 1, D26, 0|I, 23, B29, 1, A28, 4, D27, 0||B1=1.49213776|B2=1.49810212|B3=1.48885538|B4=1.0890969|B5=1.52647002|B6=1.09956024|B7=1.0892976|B8=1.52851715|B9=1.09922071|B10=1.08878159|B11=1.52751634|B12=1.10010483|B13=1.09115509|B14=1.09031216|B15=1.0925981|B16=1.09144573|B17=1.09282722|B18=1.09105064|B19=1.09110881|B20=1.09255746|B21=1.09050925|B23=1.07470364|B24=1.50596231|B25=1.07454491|B26=1.08931153|B27=1.09371821|B28=1.08928098|A1=109.83732686|A2=109.80443126|A3=106.88893229|A4=116.27870241|A5=107.91380075|A6=106.80279825|A7=116.68843958|A8=107.55727978|A9=107.38935375|A10=115.66800911|A11=108.02177033|A12=113.24467088|A13=111.93093638|A14=108.08264195|A15=112.76153773|A16=107.66039745|A17=113.03785043|A18=112.01982305|A19=108.43900883|A20=112.874561|A21=113.64886693|A22=91.88245802|A23=108.79450497|A24=91.30217865|A25=110.58009741|A26=112.20448298|A27=110.41497173|A28=154.10193046|D1=-121.84422077|D2=177.79253295|D3=-60.9317438|D4=63.00383022|D5=58.34412206|D6=-180.11053454|D7=-56.35211085|D8=178.8175242|D9=-59.26072255|D10=64.16556444|D11=64.99137429|D12=-58.33054126|D13=-176.51905006|D14=-57.42325559|D15=-175.4590639|D16=66.65676421|D17=-53.05808568|D18=188.35799096|D19=69.76972114|D20=56.57476393|D21=-86.97783659|D22=34.96921625|D23=156.9306463|D24=119.13477804|D25=-1.36834476|D26=-121.80799074|D27=-146.05413099|B22=2.03846975|B29=2.92510329||Version=x86-Win32-G03RevB.05|State=1-A|HF=-7291.2397287|RMSD=2.175e-009|RMSF=2.134e-005|Dipole=0.3350088,-4.7199304,1.5303196|PG=C01 [X(C8H20I1N1)]||@

**MP2/LANL2DZ transition structure:**

|                | 1         | 2       | 3       |
|----------------|-----------|---------|---------|
|                | A         | A       | A       |
| Frequencies -- | -488.8166 | 47.3891 | 52.6367 |
| Red. masses -- | 8.0680    | 3.5211  | 2.1292  |
| Frc consts --  | 1.1358    | 0.0047  | 0.0035  |
| IR Inten --    | 2005.5705 | 0.6256  | 0.9259  |

Sum of electronic and zero-point Energies= -380.582365  
Sum of electronic and thermal Energies= -380.568317  
Sum of electronic and thermal Enthalpies= -380.567372  
Sum of electronic and thermal Free Energies= -380.624413

1|1|UNPC-UNK|FTS|RMP2-FC|LANL2DZ|C8H20I1N1|PCUSER|01-Jun-2005|1||# MP2 /LANL2DZ OPT=(TS,NOEIGEN,Z-MATRIX)||ET3N + EtI Menshutkin||0,1|N|C,1,B1|C,1,B2,2,A1|C,1,B3,3,A2,2,D1,0|H,2,B4,1,A3,4,D2,0|C,2,B5,1,A4,4,D3,0|H,2,B6,1,A5,4,D4,0|H,3,B7,1,A6,4,D5,0|C,3,B8,1,A7,4,D6,0|H,3,B9,1,A8,4,D7,0|H,4,B10,1,A9,3,D8,0|C,4,B11,1,A10,3,D9,0|H,4,B12,1,A11,3,D10,0|H,6,B13,2,A12,1,D11,0|H,6,B14,2,A13,1,D12,0|H,6,B15,2,A14,1,D13,0|H,9,B16,3,A15,1,D14,0|H,9,B17,3,A16,1,D15,0|H,9,B18,3,A17,1,D16,0|H,12,B19,4,A18,1,D17,0|H,12,B20,4,A19,1,D18,0|H,12,B21,4,A20,1,D19,0|C,1,B22,4,A21,12,D20,0|H,23,B23,1,A22,4,D21,0|C,23,B24,1,A23,4,D22,0|H,23,B25,1,A24,4,D23,0|H,25,B26,23,A25,1,D24,0|H,25,B27,23,A26,1,D25,0|H,25,B28,23,A27,1,D26,0|I,23,B29,1,A28,4,D27,0||B1=1.52624762|B2=1.53291188|B3=1.52374463|B4=1.10082677|B5=1.55445372|B6=1.11254105|B7=1.10131007|B8=1.5563176|B9=1.11234512|B10=1.09890727|B11=1.55567892|B12=1.11316297|B13=1.10239953|B14=1.10128298|B15=1.10515918|B16=1.10184342|B17=1.10537518|B18=1.1021664|B19=1.10215315|B20=1.10511773|B21=1.1019805|B23=1.08

519514|B24=1.54083738|B25=1.08531149|B26=1.10093846|B27=1.10302693|B28=1.10089194|A1=109.9984028|A2=108.99896444|A3=106.76525766|A4=114.89584178|A5=108.2135148|A6=106.62347103|A7=115.49364096|A8=107.82676342|A9=107.62399015|A10=113.91887873|A11=108.06174966|A12=112.88876253|A13=111.3093729|A14=108.03316905|A15=112.12561032|A16=107.72913311|A17=112.63144523|A18=111.26713423|A19=108.59576712|A20=112.39275167|A21=115.29882864|A22=88.86208891|A23=105.06506541|A24=88.06275381|A25=110.14960812|A26=112.15966489|A27=110.15815414|A28=158.87322522|D1=-121.50485589|D2=178.91564364|D3=-60.92361539|D4=62.51837739|D5=63.06876234|D6=-176.29990643|D7=-53.20763691|D8=178.2429138|D9=-60.50833565|D10=61.99318189|D11=65.75094835|D12=-57.28035435|D13=-175.49506119|D14=-55.26043843|D15=-173.31669599|D16=68.47696923|D17=-50.39791214|D18=190.93640055|D19=72.02765002|D20=55.30881596|D21=-87.93553424|D22=32.94658392|D23=153.59291489|D24=120.0092518|D25=-0.71412604|D26=-121.66551226|D27=-148.31638353|B22=2.07457348|B29=2.78634286| |Version=x86-Win32-G03RevB.05|State=1-A|HF=-380.0027025|MP2=-380.859439|RMSD=1.896e-009|RMSF=1.531e-005|Dipole=0.6523323,-4.4328332,1.3770578|PG=C01 [X(C8H20I1N1)]|@

**MP2/LANL2DZd transition structure:**

|                | 1         | 2       | 3       |
|----------------|-----------|---------|---------|
|                | A         | A       | A       |
| Frequencies -- | -488.6499 | 46.9138 | 52.6899 |
| Red. masses -- | 8.1106    | 3.5349  | 2.1300  |
| Frc consts --  | 1.1410    | 0.0046  | 0.0035  |
| IR Inten --    | 1931.1510 | 0.7587  | 0.7911  |

Sum of electronic and zero-point Energies= -380.675682  
Sum of electronic and thermal Energies= -380.661588  
Sum of electronic and thermal Enthalpies= -380.660644  
Sum of electronic and thermal Free Energies= -380.717788

1 1\1\ ASN\_ALTIX-ALTIX7\Freq\RMP2-FC\Gen\C8H20I1N1\AUBOX\04-Oct-2007\1\ \# MP2/LANL2DZ ExtraBasis freq\ET3N + EtI Menshutkin extra d orbital on I\0,1\N\C,1,B1\C,1,B2,2,A1\C,1,B3,3,A2,2,D1,0\H,2,B4,1,A3,4,D2,0\C,2,B5,1,A4,4,D3,0\H,2,B6,1,A5,4,D4,0\H,3,B7,1,A6,4,D5,0\C,3,B8,1,A7,4,D6,0\H,3,B9,1,A8,4,D7,0\H,4,B10,1,A9,3,D8,0\C,4,B11,1,A10,3,D9,0\H,4,B12,1,A11,3,D10,0\H,6,B13,2,A12,1,D11,0\H,6,B14,2,A13,1,D12,0\H,6,B15,2,A14,1,D13,0\H,9,B16,3,A15,1,D14,0\H,9,B17,3,A16,1,D15,0\H,9,B18,3,A17,1,D16,0\H,12,B19,4,A18,1,D17,0\H,12,B20,4,A19,1,D18,0\H,12,B21,4,A20,1,D19,0\C,1,B22,4,A21,12,D20,0\H,23,B23,1,A22,4,D21,0\C,23,B24,1,A23,4,D22,0\H,23,B25,1,A24,4,D23,0\H,25,B26,23,A25,1,D24,0\H,25,B27,23,A26,1,D25,0\H,25,B28,23,A27,1,D26,0\I,23,B29,1,A28,4,D27,0\B1=1.525\B2=1.5316\B3=1.5224\B4=1.1009\B5=1.5546\B6=1.113\B7=1.1015\B8=1.5566\B9=1.1129\B10=1.0993\B11=1.5559\B12=1.1137\B13=1.1024\B14=1.1016\B15=1.1051\B16=1.1021\B17=1.1054\B18=1.1022\B19=1.1024\B20=1.1051\B21=1.102\B23=1.0855\B24=1.5404\B25=1.0856\B26=1.1013\B27=1.103\B28=1.1013\A1=110.0774\A2=109.1306\A3=106.8173\A4=114.7532\A5=108.3922\A6=106.6852\A7=115.4462\A8=107.9897\A9=107.6001\A10=113.8864\A11=108.2579\A12=112.8697\A13=111.264\A14=108.1145\A15=112.1498\A16=107.7637\A17=112.6318\A18=111.2314\A19=108.6465\A20=112.3986\A21=115.4072\A22=87.4772\A23=104.6416\A24=86.685\A25=110.0875\A26=111.9979\A27=110.0633\A28=158.3365\D1=-121.6153\D2=179.0532\D3=-60.8648\D4=62.5916\D5=62.9408\D6=-176.476\D7=-53.3696\D8=178.7952\D9=-60.0609\D10=62.5038\D11=66.1587\D12=-56.8094\D13=-175.0351\D14=-55.2308\D15=-173.2915\D16=68.4755\D17=-50.2009\D18=191.1



212\D19=72.1741\D20=55.6594\D21=-88.3133\D22=32.3237\D23=152.7732\D24=  
120.0212\D25=-0.6543\D26=-121.5123\D27=-148.9837\B22=2.1132\B29=2.7308  
\Version=IA64L-G03RevD.01\State=1-A\HF=-380.0071288\MP2=-380.9525212\  
RMSD=3.447e-09\RMSF=2.069e-05\ZeroPoint=0.2768394\Thermal=0.2909328\Di  
pole=0.5677471,-4.351022,1.3198759\

### Gaussian 03 Reference

Gaussian 03, Revision B.03,  
M. J. Frisch, G. W. Trucks, H. B. Schlegel, G. E. Scuseria,  
M. A. Robb, J. R. Cheeseman, J. A. Montgomery, Jr., T. Vreven,  
K. N. Kudin, J. C. Burant, J. M. Millam, S. S. Iyengar, J. Tomasi,  
V. Barone, B. Mennucci, M. Cossi, G. Scalmani, N. Rega,  
G. A. Petersson, H. Nakatsuji, M. Hada, M. Ehara, K. Toyota,  
R. Fukuda, J. Hasegawa, M. Ishida, T. Nakajima, Y. Honda, O. Kitao,  
H. Nakai, M. Klene, X. Li, J. E. Knox, H. P. Hratchian, J. B. Cross,  
C. Adamo, J. Jaramillo, R. Gomperts, R. E. Stratmann, O. Yazyev,  
A. J. Austin, R. Cammi, C. Pomelli, J. W. Ochterski, P. Y. Ayala,  
K. Morokuma, G. A. Voth, P. Salvador, J. J. Dannenberg,  
V. G. Zakrzewski, S. Dapprich, A. D. Daniels, M. C. Strain,  
O. Farkas, D. K. Malick, A. D. Rabuck, K. Raghavachari,  
J. B. Foresman, J. V. Ortiz, Q. Cui, A. G. Baboul, S. Clifford,  
J. Cioslowski, B. B. Stefanov, G. Liu, A. Liashenko, P. Piskorz,  
I. Komaromi, R. L. Martin, D. J. Fox, T. Keith, M. A. Al-Laham,  
C. Y. Peng, A. Nanayakkara, M. Challacombe, P. M. W. Gill,  
B. Johnson, W. Chen, M. W. Wong, C. Gonzalez, and J. A. Pople,  
Gaussian, Inc., Pittsburgh PA, 2003.
